# Supplementary material for: The impact of the stimulation frequency on closed-loop control with electrotactile feedback
Source: PubMed Central journal article supplement (PMC4403675; doi:10.1186/s12984-015-0022-8), 2015-04-09
Supplement: 12984_2015_22_MOESM1_ESM.pdf [file 12984_2015_22_MOESM1_ESM.pdf]

## Additional files

### Additional file 1 – Appendix A

The expression Squared Pearson Correlation Coefficient (SPCC) is:

$$SPCC(\%) = CORR^2 * 100$$

$$\text{with } CORR = \frac{\text{cov}(r(t), y(t))}{\sqrt{\text{cov}(r(t), r(t)) * \text{cov}(y(t), y(t))}},$$

The expression Normalized Root Mean Squared Tracking Error (NRMSTE) is:

$$NRMSTE(\%) = \frac{\sqrt{\sum_1^N (r(t) - y(t))^2}}{\max(r(t)) - \min(r(t))} * 100,$$

where  $N$  is the number of samples,  $cov$  denotes covariance, and  $r(t)$  and  $y(t)$  are the reference and generated trajectory, respectively.
